# Supplementary material for: Shared features of cryptic plasmids from environmental and pathogenic Francisella species
Source: PubMed Central journal article supplement (PMC5570271; doi:10.1371/journal.pone.0183554), 2017-08-24

Figure S2. Progressive Mauve alignment of the AZ06-7470 plasmid with TX07-6608 plasmids 3 and 4, pFNPA10 from *F. novicida*-like strain PA10-7858, the DPG\_3A-IS plasmid and the pFSC454 plasmid. The different regions of similarity are shown in different colors.

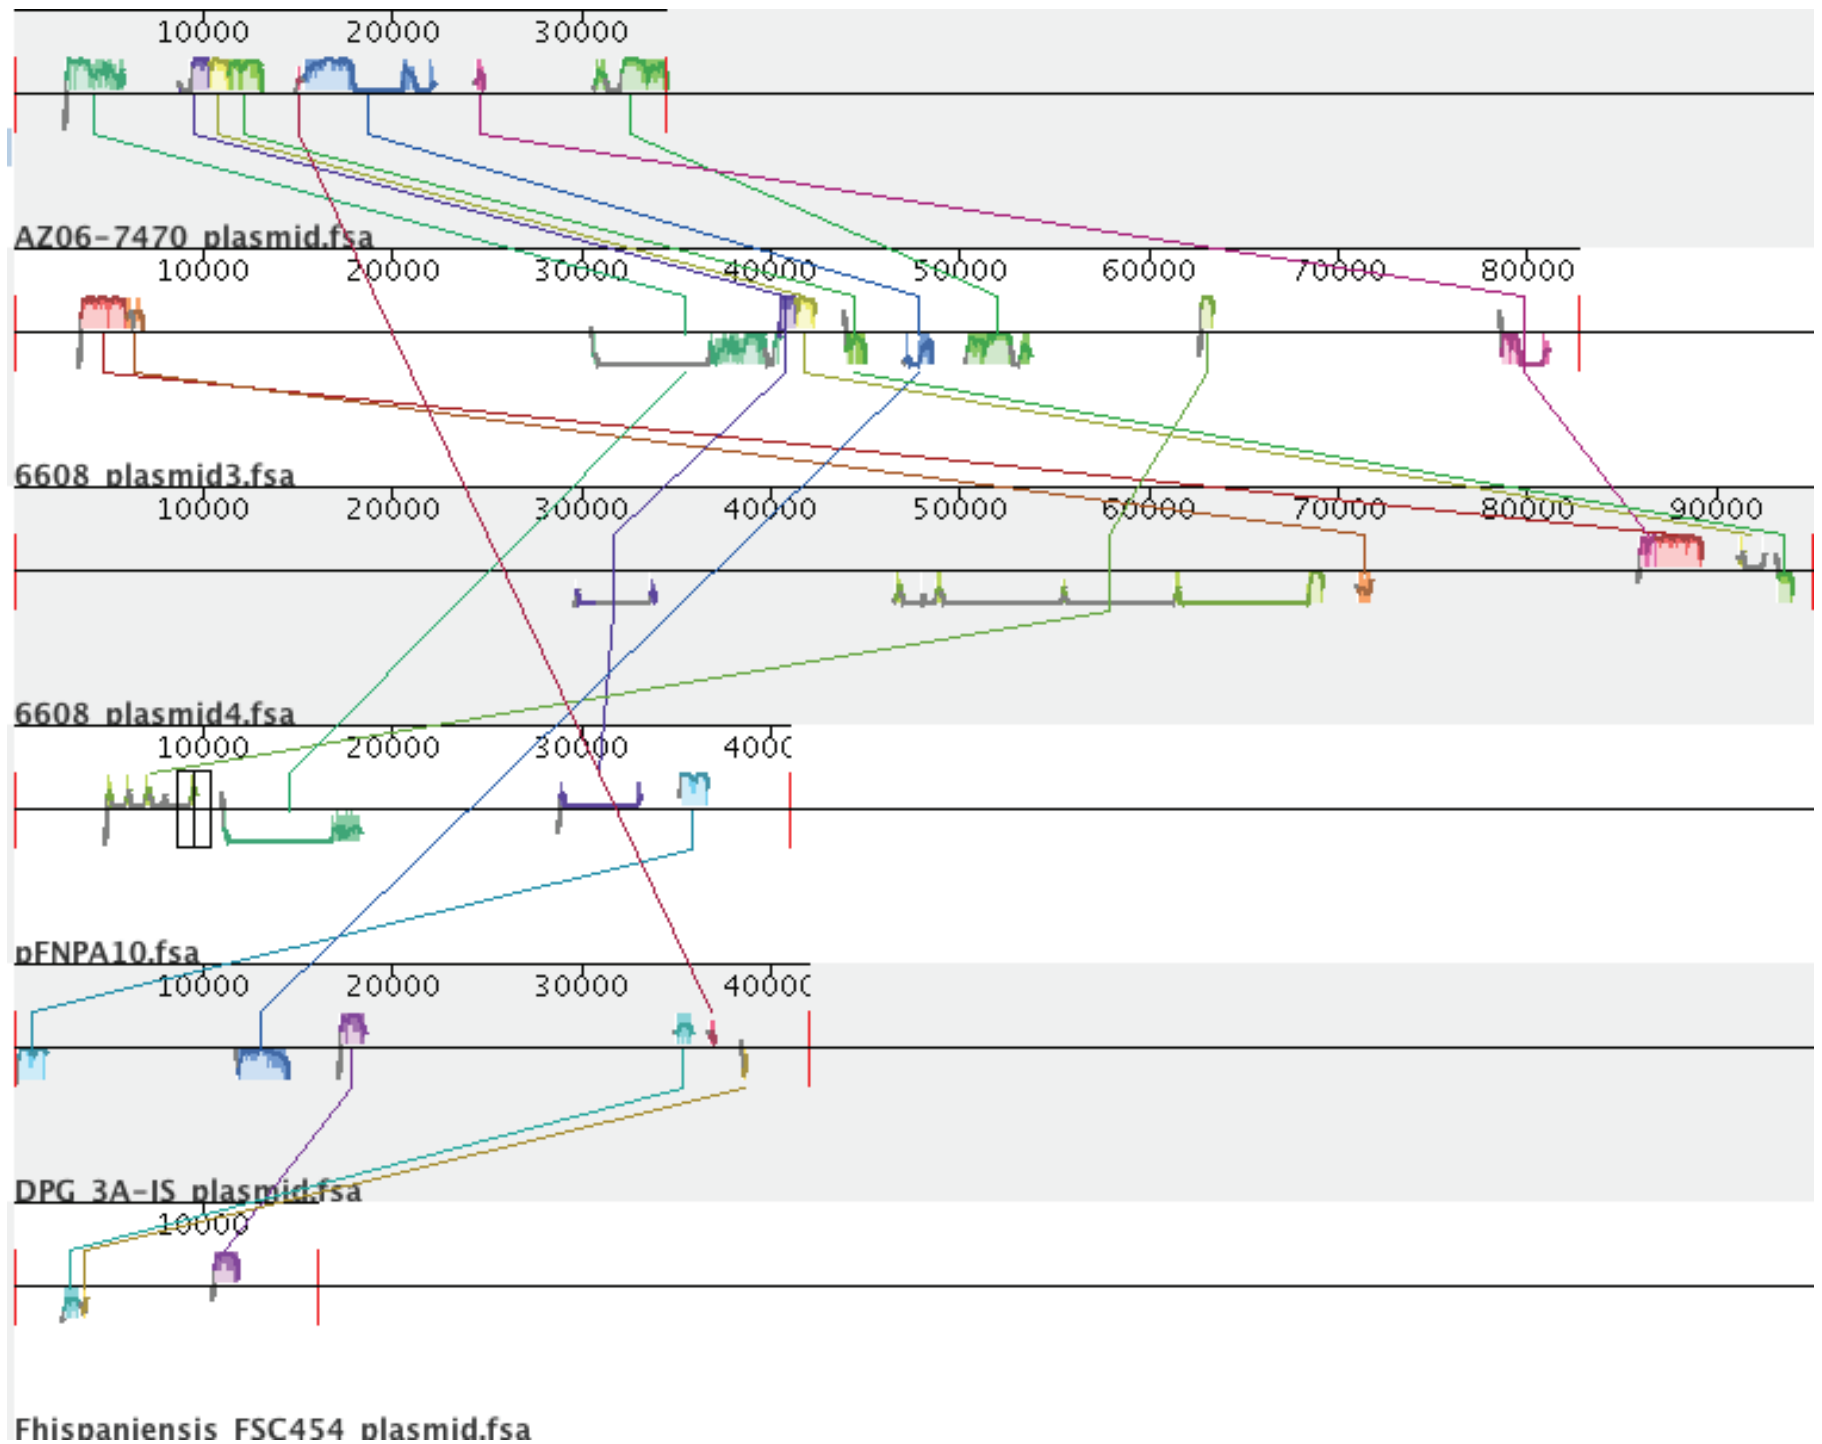

Supplement: pone.0183554.s002.pdf [file pone.0183554.s002.pdf]
