# Supplementary material for: Shared features of cryptic plasmids from environmental and pathogenic Francisella species
Source: PubMed Central journal article supplement (PMC5570271; doi:10.1371/journal.pone.0183554), 2017-08-24

**A** AZ06-7470

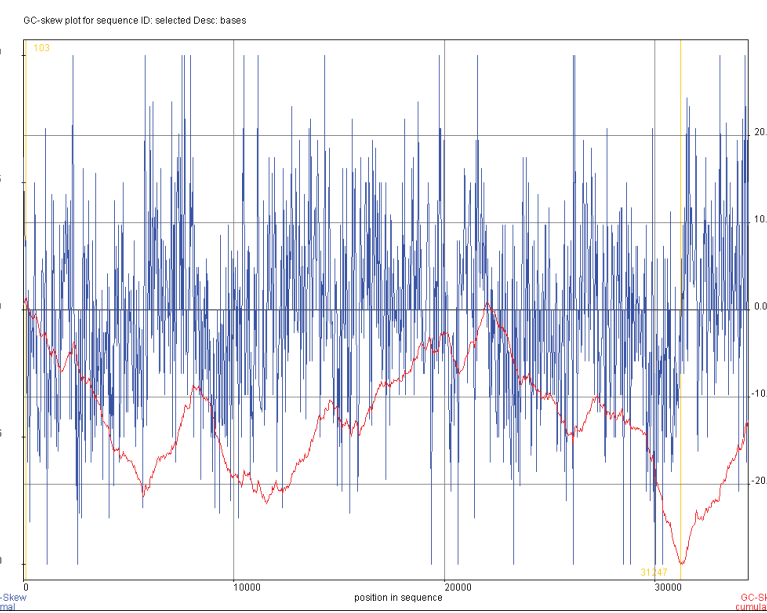

**B** CA97-1460

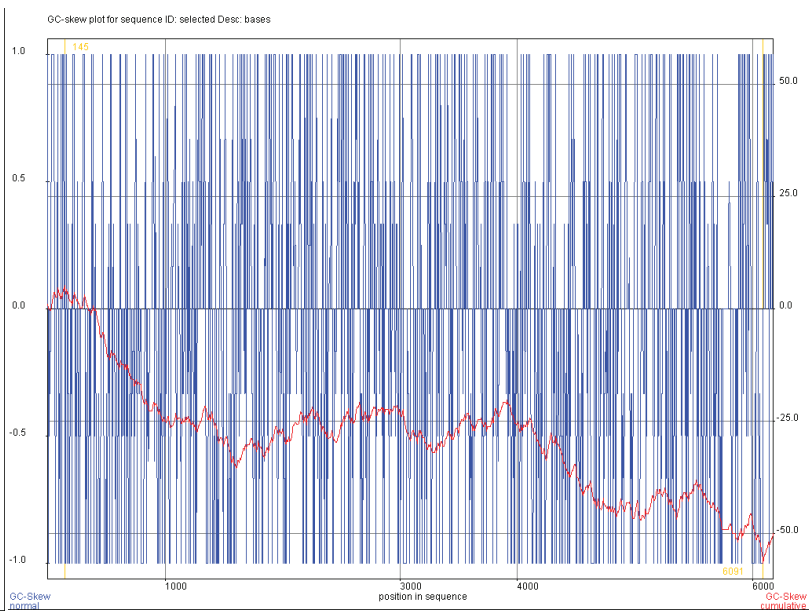

**C** MA06-7296

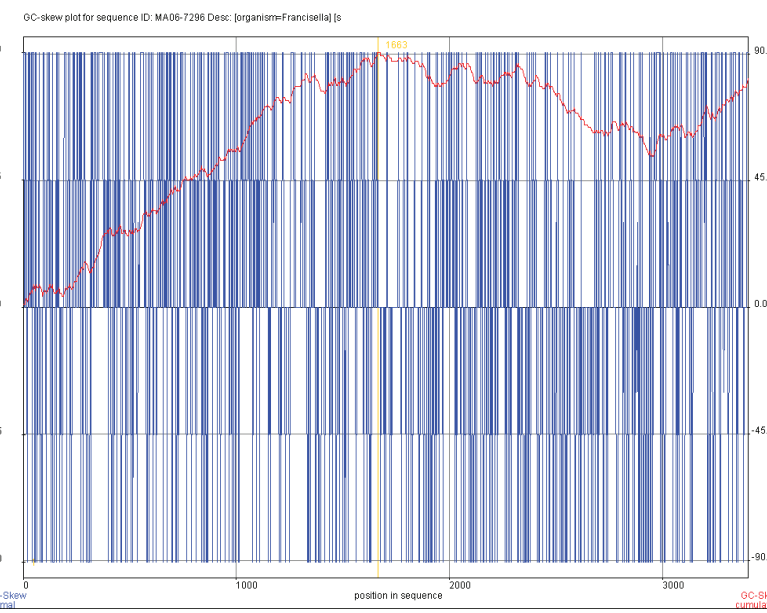

**D** DPG\_3A-IS

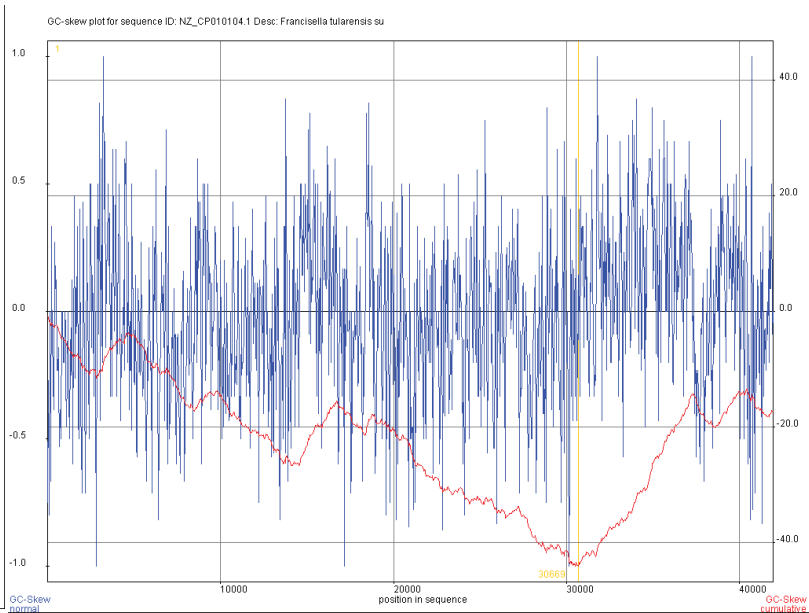

**E** FSC454

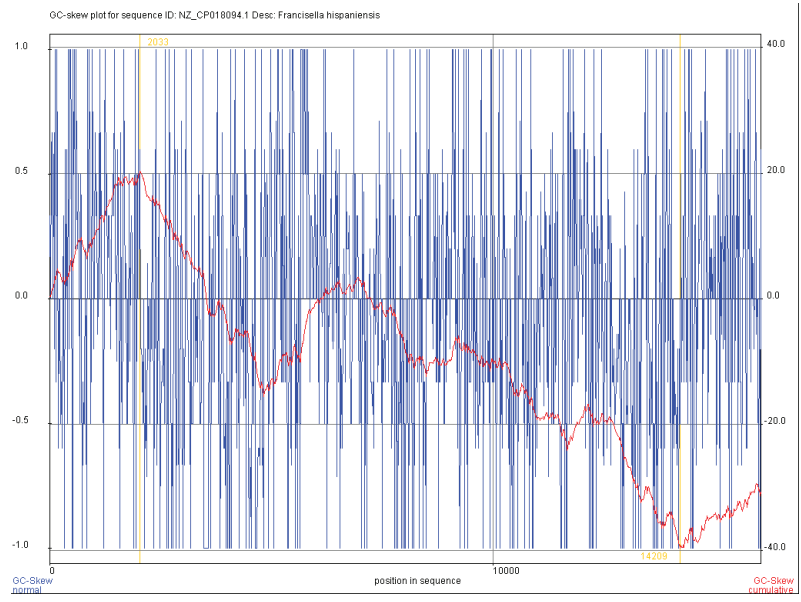

Supplement: pone.0183554.s004.pdf [file pone.0183554.s004.pdf]
