# Supplementary material for: Shared features of cryptic plasmids from environmental and pathogenic Francisella species
Source: PubMed Central journal article supplement (PMC5570271; doi:10.1371/journal.pone.0183554), 2017-08-24
Supplement: pone.0183554.s006.pdf [file pone.0183554.s006.pdf]

**Table S1. Features of the *Francisella novicida*-like TX07-6608, *F. opportunistica* MA06-7296, *F. novicida* AZ06-7470 and *F. frigiditurris* CA97-1460 plasmids. The plasmids from *F. novicida* DPG\_3A-IS and *F. hispaniensis* FSC454 are included for comparison purposes.**

| <i>Francisella</i> sp.<br>TX07-6608 |                  |                   |                                       |                                                                                                                                                                                                                         |                                       |
|-------------------------------------|------------------|-------------------|---------------------------------------|-------------------------------------------------------------------------------------------------------------------------------------------------------------------------------------------------------------------------|---------------------------------------|
| <b>Plasmid 1</b>                    | <b>2,621 bp</b>  | <b>1 ORF</b>      |                                       |                                                                                                                                                                                                                         |                                       |
| Locus_tag                           | ORF size (bp)    | protein size (aa) | annotated function                    | closest database hit(s) (species, identifier, %identity)                                                                                                                                                                | hit location (chromosome, plasmid)    |
| KK00_2307                           | 926              | 308               | replication family protein            | <i>F. philomiragia</i> ATCC 25016, F242_0002, 29%;<br><i>F. philomiragia</i> GA01-2801, LA02_2035, 30%;<br><i>Allofrancisella guangzhouensis</i> , SD28_07730, 29%;<br><i>F. philomiragia</i> GA01-2794, LA55_2099, 28% | pF242<br>pFPK_2<br>plasmid<br>plasmid |
| <b>Plasmid 2</b>                    | <b>3,546 bp</b>  | <b>3 ORFs</b>     |                                       |                                                                                                                                                                                                                         |                                       |
| Locus_tag                           | ORF size (bp)    | protein size (aa) | annotated function                    | closest database hit(s) (species, identifier, %identity)                                                                                                                                                                | hit location (chromosome, plasmid)    |
| KX00_2304                           | 366              | 121               | helix-turn-helix domain protein       | <i>A. guangzhouensis</i> , SD28_06415, 68%                                                                                                                                                                              | chromosome                            |
| KX00_2305                           | 1,533            | 510               | hypothetical protein                  | no hits                                                                                                                                                                                                                 | NA                                    |
| KX00_2306                           | 339              | 112               | hypothetical protein                  | TX07-6608, KX00_2185, partial alignment 83%                                                                                                                                                                             | plasmid 3                             |
| <b>Plasmid 3*</b>                   | <b>82,910 bp</b> | <b>91 ORFs</b>    |                                       |                                                                                                                                                                                                                         |                                       |
| Locus_tag                           | ORF size (bp)    | protein size (aa) | annotated function                    | closest database hit(s) (species, identifier, %identity)                                                                                                                                                                | hit location (chromosome, plasmid)    |
| KX00_2112                           | 993              | 330               | transposase                           | TX07-6608, KX00_228, 100%                                                                                                                                                                                               | plasmid 4                             |
| KX00_2113                           | 324              | 107               | transposase                           | TX07-6608, KX00_2282, 100%                                                                                                                                                                                              | plasmid 4                             |
| KX00_2115                           | 1,776            | 591               | group II intron reverse transcriptase | TX07-6608, KX00_2279/KX00_2277/<br>KX00_2239/KX00_2206, 96%                                                                                                                                                             | plasmid4                              |
| KX00_2117                           | 363              | 120               | DNA binding protein HU                | TX07-6608, KX00_2208, 77%                                                                                                                                                                                               | plasmid 4<br>pFNPA10                  |

|           |       |     |                                          |                                                                             |            |
|-----------|-------|-----|------------------------------------------|-----------------------------------------------------------------------------|------------|
| KX00_2120 | 564   | 187 | DNA-3-methyladenine glycosylase          | <i>Francisella</i> sp. FSC1006, LO80_09240, 78%                             | chromosome |
| KX00_2122 | 504   | 167 | single-stranded DNA-binding protein      | <i>A. guangzhouensis</i> , SD28_01055, 56%                                  | chromosome |
| KX00_2123 | 852   | 283 | recombination-associated protein         | <i>Francisella</i> sp. W12-1067, FRA_24c00970, 82%                          | ND         |
| KX00_2128 | 603   | 200 | transposase                              | TX07-6608 KX00_2214 69%                                                     | plasmid 4  |
| KX00_2131 | 330   | 109 | toxin RelE                               | <i>Leucothrix mucor</i> , WP_026744838.1, 64%                               | chromosome |
| KX00_2132 | 294   | 97  | transcriptional regulator                | <i>Psychromonas</i> sp. CNPT3, PCNPT3_06200, 51%                            | chromosome |
| KX00_2133 | 978   | 325 | transposase                              | TX07-6608, KX00_2300 + many copies at 100%                                  | plasmid 4  |
| KX00_2135 | 2,364 | 787 | conjugal transfer protein TraG           | TX07-6608, KX00_2216, 85%                                                   | plasmid 4  |
| KX00_2136 | 462   | 153 | single-stranded DNA-binding protein      | <i>F. novicida</i> PA10-7858, N894_0021 34%                                 | pFNPA10    |
| KX00_2138 | 453   | 150 | transposase                              | <i>F. tularensis</i> , multiple genomes, 72%                                | chromosome |
| KX00_2139 | 120   | 39  | transposase                              | TX07-6608, KX00_2259 + many copies at 100%                                  | plasmid 4  |
| KX00_2140 | 978   | 325 | transposase                              | TX07-6608, KX00_2300 + many copies at 100%                                  | plasmid 4  |
| KX00_2141 | 237   | 78  | plasmid pRiA4b ORF-3-like family protein | <i>Halobacteroides halobius</i> DSM 5150, Halha_1116, partial alignment 52% | chromosome |
| KX00_2142 | 1,236 | 411 | group II intron reverse transcriptase    | TX07-6608, KX00_2279 + 2 copies, 97%                                        | plasmid 4  |
| KX00_2147 | 459   | 152 | conjugal transfer protein TraF           | <i>F. novicida</i> PA10-7858, N894_0014, 30%                                | pFNPA10    |
| KX00_2149 | 462   | 153 | single-strand binding family protein     | <i>F. novicida</i> PA10-7858, N894_0021, 33%                                | pFNPA10    |
| KX00_2150 | 258   | 85  | transposase                              | TX07-6608, KX00_2272, 100%                                                  | plasmid 4  |
| KX00_2152 | 651   | 216 | transposase                              | TX07-6608, KX00_2272, 93%                                                   | plasmid 4  |
| KX00_2153 | 1,977 | 658 | conjugal transfer protein TraG           | TX07-6608, KX00_2216, 89%                                                   | plasmid 4  |

|           |       |       |                                          |                                                                                                              |                             |
|-----------|-------|-------|------------------------------------------|--------------------------------------------------------------------------------------------------------------|-----------------------------|
| KX00_2157 | 1,236 | 411   | group II intron reverse transcriptase    | TX07-6608, KX00_2279 + 2 copies, 97%                                                                         | plasmid 4                   |
| KX00_2159 | 561   | 186   | site-specific recombinase?               | <i>Legionella drancourtii</i> 62%<br>TX07-6608, KX00_2210, 35%; <i>F. novicida</i> PA10-7858, N894_0050, 38% | ND<br>plasmid 4;<br>pFNPA10 |
| KX00_2160 | 1,170 | 389   | transposase                              | TX07-6608, KX00_2293, 42%; KX00_2294, 53%                                                                    | plasmid 4                   |
| KX00_2161 | 3,012 | 1,003 | transposase                              | TX07-6608, KX00_2280, KX00_2240, 100%                                                                        | plasmid 4                   |
| KX00_2162 | 1,236 | 411   | group II intron reverse transcriptase    | TX07-6608, KX00_2279 + 2 copies, 97%                                                                         | plasmid 4                   |
| KX00_2164 | 1,236 | 411   | group II intron reverse transcriptase    | TX07-6608, KX00_2278 + 2 copies, 57%                                                                         | plasmid 4                   |
| KX00_2166 | 297   | 99    | transposase                              | <i>F. tularensis</i> , multiple genomes, 87%                                                                 | chromosome                  |
| KX00_2167 | 621   | 206   | site-specific recombinase?               | <i>Legionella drancourtii</i> 68%<br><i>F. novicida</i> PA10-7858, N894_0001, 39%                            | ND<br>pFNPA10               |
| KX00_2171 | 183   | 60    | transposase                              | TX07-6608, KX00_2286 + many copies at 98%                                                                    | plasmid 4                   |
| KX00_2172 | 603   | 200   | transposase                              | TX07-6608 KX00_2272 99%                                                                                      | plasmid 4                   |
| KX00_2173 | 501   | 166   | transposase                              | <i>F. philomiragia</i> 25017, Fphi_0511, 88%                                                                 | chromosome                  |
| KX00_2174 | 1,842 | 613   | SAM-dependent methyltransferase          | <i>F. tularensis</i> , multiple genomes, 81%                                                                 | chromosome                  |
| KX00_2175 | 1,023 | 340   | transposase                              | TX07-6608, KX00_2272. 99%                                                                                    | plasmid 4                   |
| KX00_2177 | 4,275 | 1,424 | conjugal transfer protein TraA           | TX07-6608, KX00_2206;KX00_2301, 88%                                                                          | plasmid 4                   |
| KX00_2180 | 555   | 184   | sensory box protein                      | TX07-6608, KX00_229; KX00_2223, 53%                                                                          | plasmid 4                   |
| KX00_2182 | 5,799 | 1,932 | non-ribosomal peptide synthetase         | <i>F. novicida</i> DPG_3A-IS, CH70_1995, 78%                                                                 | plasmid                     |
| KX00_2183 | 963   | 320   | ParB/RepB/Spo0J partition domain protein | Rickettsiales bacterium Ac37b, NOVO_09455, 38%<br>TX07-6608, KX00_2243, 26%                                  | plasmid                     |
| KX00_2184 | 1,014 | 337   | ParA/ParB                                | <i>Legionella pneumophila</i> , 43%                                                                          | plasmid 4<br>ND             |
| KX00_2187 | 585   | 194   | helix-turn-helix family protein          | <i>Piscirickettsia salmonis</i> , KW89_2249, 28%                                                             | pFPK_1<br>chromosome        |
| KX00_2193 | 897   | 298   | toxin co-regulated                       | <i>Fangia hongkongensis</i> , 35% partial alignment                                                          | ND                          |

| KX00_2195         | 261              | 86                   | pilus biosynthesis<br>Q family protein<br>transposase     | TX07-6608, KX00_2234 100%                                               | plasmid 4                                |
|-------------------|------------------|----------------------|-----------------------------------------------------------|-------------------------------------------------------------------------|------------------------------------------|
| KX00_2196         | 231              | 76                   | helix-turn-helix<br>domain protein                        | TX07-6608, KX00_2233 100%                                               | plasmid 4                                |
| KX00_2197         | 978              | 325                  | transposase                                               | TX07-6608, KX00_2300 + many copies at 100%                              | plasmid 4                                |
| KX00_2198         | 468              | 155                  | phosphotransferase<br>enzyme family<br>protein            | <i>Holospira undulata</i> , K737_300648, 76%                            | ND                                       |
| KX00_2199         | 333              | 110                  | antitoxin HicB                                            | uncultured bacterium, ACD_21C00221G0001,<br>57%                         | ND                                       |
| KX00_2201         | 699              | 232                  | transposase                                               | TX07-6608, KX00_2235 + many copies at 100%                              | plasmid 4                                |
| <b>Plasmid 4*</b> | <b>82,739 bp</b> | <b>102<br/>ORFs</b>  |                                                           |                                                                         |                                          |
| Locus_tag         | ORF size<br>(bp) | protein<br>size (aa) | annotated function                                        | closest database hit species, identifier, %identity                     | hit location<br>(chromosome,<br>plasmid) |
| KX00_2202         | 225              | 74                   | integrase                                                 | <i>Francisella</i> sp. W12-1067, FRA_44c11820,<br>partial alignment 90% | ND                                       |
| KX00_2204         | 180              | 59                   | transposase                                               | TX07-6608, KX00_2197 + many copies, 68%<br>first 59 aa align            | plasmid 3                                |
| KX00_2205         | 978              | 325                  | transposase                                               | TX07-6608 KX00_2197 + 2 copies, 100%                                    | plasmid 3                                |
| KX00_2206         | 1,107            | 368                  | conjugal transfer<br>protein TraA                         | TX07-6608, KX00_2177, 91%                                               | plasmid 3                                |
| KX00_2208         | 366              | 121                  | DNA binding<br>protein HU                                 | TX07-6608, KX00_2117, 77%                                               | plasmid 3                                |
| KX00_2210         | 621              | 206                  | site-specific<br>recombinase                              | <i>Legionella fairfieldensis</i> 65%                                    | ND                                       |
| KX00_2212         | 1,233            | 410                  | DNA polymerase                                            | <i>Fangia hongkongensis</i> 43%                                         | ND                                       |
| KX00_2213         | 654              | 217                  | transcriptional<br>regulator, LexA-<br>like or XRE family | <i>F. philomiragia</i> multiple genomes 65%                             | chromosome                               |
| KX00_2218         | 978              | 325                  | transposase                                               | TX07-6608, KX00_2197 + 2 copies, 100%                                   | plasmid 3                                |
| KX00_2220         | 231              | 76                   | transposase                                               | TX07-6608, KX00_2160; KX00_2160, 53%                                    | plasmid 3                                |
| KX00_2221         | 1,941            | 646                  | lipase                                                    | <i>F. novicida</i> GA99-3549, FTCCG_01014, 36%; <i>F.</i>               | chromosome                               |

|           |       |     |                                                                  |                                                                                                                                             |                                |
|-----------|-------|-----|------------------------------------------------------------------|---------------------------------------------------------------------------------------------------------------------------------------------|--------------------------------|
| KX00_2223 | 1,143 | 380 | sensory box protein                                              | <i>novicida</i> F6168, AS84_1001, 36%<br>TX07-6608, KX00_2180, 53%                                                                          | plasmid 3                      |
| KX00_2226 | 249   | 82  | integrase                                                        | <i>Francisella</i> sp. W12-1067, many copies, partial alignment 89%                                                                         | ND                             |
| KX00_2227 | 978   | 325 | transposase                                                      | TX07-6608, KX00_2197 + 2 copies, 100%                                                                                                       | plasmid 3                      |
| KX00_2228 | 978   | 325 | transposase                                                      | TX07-6608, KX00_2197 + 2 copies, 100%                                                                                                       | plasmid 3                      |
| KX00_2229 | 228   | 75  | integrase                                                        | TX07-6608, KX00_2134, 100% partial alignment                                                                                                | plasmid 3                      |
| KX00_2230 | 435   | 144 | integrase                                                        | <i>Francisella</i> sp. W12-1067, partial alignment 92%                                                                                      | ND                             |
| KX00_2231 | 996   | 331 | RepB                                                             | <i>Francisella</i> sp. W12-1067, 49%<br><i>F. philomiragia</i> ATCC25017, LA56_RS09235, 39% ; <i>F. novicida</i> F6168, 36%; F243_0006, 41% | ND<br>pFPJ_1; pFNL10;<br>pF243 |
| KX00_2232 | 978   | 325 | transposase                                                      | TX07-6608 KX00_2197 + 2 copies, 100%                                                                                                        | plasmid 3                      |
| KX00_2233 | 975   | 324 | integrase                                                        | TX07-6608, KX00_2196;KX00_2196, 100%                                                                                                        | plasmid 3                      |
| KX00_2234 | 261   | 86  | transposase                                                      | TX07-6608, KX00_2197 + 2 copies, 100%                                                                                                       | plasmid 3                      |
| KX00_2235 | 243   | 80  | transposase                                                      | TX07-6608, KX00_2201, 100%                                                                                                                  | plasmid 3                      |
| KX00_2237 | 231   | 76  | transposase                                                      | TX07-6608, KX00_2201, 100%                                                                                                                  | plasmid 3                      |
| KX00_2239 | 1,236 | 411 | group II intron<br>reverse<br>transcriptase                      | TX07-6608, KX00_2164 + 4 copies, 97%                                                                                                        | plasmid 3                      |
| KX00_2240 | 276   | 91  | transposase                                                      | TX07-6608, KX00_2161, 100%                                                                                                                  | plasmid 3                      |
| KX00_2241 | 978   | 325 | transposase                                                      | TX07-6608, KX00_2197 + 2 copies, 100%                                                                                                       | plasmid 3                      |
| KX00_2242 | 639   | 212 | ParM                                                             | <i>Legionella shakespearei</i> 58%; <i>F. uliginis</i> TX07-7310, 40%                                                                       | ND; chromosome                 |
| KX00_2243 | 867   | 288 | ParB/RepB/Spo0J                                                  | <i>Legionella moravica</i> , 34%; TX07-6608, KX00_2183, 26%                                                                                 | ND<br>plasmid 3                |
| KX00_2248 | 282   | 93  | DNA-binding<br>protein HU                                        | <i>F. novicida</i> PA10-7858, N894_0031, 81%                                                                                                | pFNPA10                        |
| KX00_2252 | 1,143 | 379 | putative S-adenosylmethionin<br>e-dependent<br>methyltransferase | <i>Fangia hongkongensis</i> , 61%                                                                                                           | ND                             |
| KX00_2256 | 1,824 | 607 | transposase                                                      | TX07-6608, KX00_2161, 22% partial alignment                                                                                                 | plasmid 3                      |
| KX00_2258 | 978   | 325 | transposase                                                      | TX07-6608, KX00_2197 + 2 copies, 100%                                                                                                       | plasmid 3                      |
| KX00_2259 | 273   | 90  | transposase                                                      | TX07-6608, KX00_2197 + 2 copies, 100%                                                                                                       | plasmid 3                      |

|           |       |     |                                              |                                                            |            |
|-----------|-------|-----|----------------------------------------------|------------------------------------------------------------|------------|
| KX00_2261 | 978   | 325 | transposase                                  | TX07-6608, KX00_2197 + 2 copies, 100%                      | plasmid 3  |
| KX00_2262 | 243   | 80  | transposase                                  | TX07-6608, KX00_2201, 98% aligns with end                  | plasmid 3  |
| KX00_2264 | 978   | 325 | transposase                                  | TX07-6608, KX00_2197 + 2 copies, 100%                      | plasmid 3  |
| KX00_2265 | 522   | 173 | Pyridoxamine 5'-phosphate oxidase            | <i>Legionella saintheleni</i> 48%                          | ND         |
| KX00_2266 | 1,044 | 347 | RepB                                         | TX07-6608, KX00_2131, 35%                                  | plasmid 3  |
| KX00_2267 | 573   | 190 | integrase                                    | <i>F. novicida</i> PA10-7858, N894_0057. 50%               | pFNPA10    |
| KX00_2270 | 309   | 102 | transcriptional regulator, Cro/CI/xre family | <i>Candidatus Competibacter denitrificans</i> , 65%        | ND         |
| KX00_2271 | 558   | 185 | transposase                                  | <i>Legionella hackeliae</i> 56%                            | chromosome |
| KX00_2272 | 1,023 | 340 | transposase                                  | TX07-6608, KX00_2197 + 2 copies, 100%                      | plasmid 3  |
| KX00_2273 | 546   | 181 | transposase                                  | TX07-6608, KX00_2175, 95%                                  | plasmid 3  |
| KX00_2275 | 231   | 76  | transposase                                  | TX07-6608 KX00_2197 + 2 copies, 100%                       | plasmid 3  |
| KX00_2277 | 1,236 | 411 | group II intron reverse transcriptase        | TX07-6608, KX00_2201, 100% aligns with first 73 aa         | plasmid 3  |
| KX00_2279 | 1,236 | 411 | group II intron reverse transcriptase        | TX07-6608, KX00_2164 + 4 copies, 97%                       | plasmid 3  |
| KX00_2280 | 276   | 91  | transposase                                  | TX07-6608, KX00_2164 + 4 copies, 97%                       | plasmid 3  |
| KX00_2281 | 429   | 142 | transposase                                  | TX07-6608, KX00_2161, 100%                                 | plasmid 3  |
| KX00_2282 | 429   | 142 | transposase                                  | TX07-6608, KX00_2197 + 2 copies, 100%                      | plasmid 3  |
| KX00_2283 | 561   | 186 | transposase                                  | TX07-6608, KX00_2112, 100%                                 | plasmid 3  |
| KX00_2284 | 978   | 325 | transposase                                  | TX07-6608 KX00_2197 + 2 copies, 100%                       | plasmid 3  |
| KX00_2285 | 468   | 155 | Initiator replication protein                | TX07-6608 KX00_2197 + 2 copies, 100%                       | plasmid 3  |
| KX00_2286 | 978   | 325 | transposase                                  | <i>F. philomiragia</i> ATCC25017, F243_0006, 40% partial   | pF243      |
| KX00_2290 | 255   | 84  | integrase                                    | TX07-6608 KX00_2197 + 2 copies, 100%                       | plasmid 3  |
| KX00_2291 | 324   | 107 | Initiator replication protein                | TX07-6608, KX00_2160, 41%                                  | plasmid 3  |
| KX00_2292 | 252   | 83  | integrase                                    | <i>Francisella</i> sp. W12-1067, FRA_71c15850, 50% partial | plasmid 3  |
| KX00_2293 | 786   | 261 | integrase                                    | TX07-6608, KX00_2160, 53% partial alignment                | plasmid 3  |
|           |       |     | integrase                                    | TX07-6608, KX00_2160, 41%                                  | plasmid 3  |

|           |       |     |                                         |                                               |            |
|-----------|-------|-----|-----------------------------------------|-----------------------------------------------|------------|
| KX00_2294 | 231   | 76  | transposase                             | TX07-6608, KX00_2160, 53% partial alignment   | plasmid 3  |
| KX00_2295 | 1,941 | 646 | lipase                                  | <i>F. novicida</i> GA99-3549, FTCG_01014, 36% | chromosome |
| KX00_2297 | 1,143 | 380 | Signal transduction<br>histidine kinase | TX07-6608, KX00_2180, 53%                     | plasmid 3  |
| KX00_2300 | 978   | 325 | transposase                             | TX07-6608, KX00_2197 + 2 copies, 100%         | plasmid 3  |
| KX00_2303 | 342   | 113 | transposase                             | TX07-6608, KX00_2197 + 2 copies, 100%         | plasmid 3  |

***F. opportunistica***

**MA06-7296**

| <b>Plasmid 1</b> | <b>3,403 bp</b> | <b>5 ORFs</b>     |                                                            |                                                     |                                    |
|------------------|-----------------|-------------------|------------------------------------------------------------|-----------------------------------------------------|------------------------------------|
| Locus_tag        | ORF size (bp)   | protein size (aa) | annotated function                                         | closest database hit species, identifier, %identity | hit location (chromosome, plasmid) |
| BBG19_1748       | 1,107           | 368               | mobilization<br>protein/plasmid<br>recombination<br>enzyme | <i>Clostridium botulinum</i> , WP_061309174.1, 63%  | ND                                 |
| BBG19_1749       | 348             | 115               | hypothetical<br>protein                                    | no hits                                             |                                    |
| BBG19_1750       | 183             | 60                | hypothetical<br>protein                                    | no hits                                             |                                    |
| BBG19_1751       | 177             | 58                | hypothetical<br>protein                                    | no hits                                             |                                    |
| BBG19_1752       | 459             | 152               | hypothetical<br>protein                                    | <i>Clostridium botulinum</i> , WP_053532535.1, 94%  | ND                                 |

***F. novicida***

**AZ06-7470**

| <b>pFNE_1*</b> | <b>34,471 bp</b> | <b>52 ORFs</b>    |                                  |                                                                       |                                    |
|----------------|------------------|-------------------|----------------------------------|-----------------------------------------------------------------------|------------------------------------|
| Locus_tag      | ORF size (bp)    | protein size (aa) | annotated function               | closest database hit species, identifier, %identity                   | hit location (chromosome, plasmid) |
| KX02_1830      | 147              | 48                | initiator replication<br>protein | TX07-6608, KX00_2266, 100% last 48 aa                                 | plasmid 4                          |
| KX02_1831      | 384              | 127               | thioesterase                     | <i>F. frigiditurris</i> CA97-1460, KX01_303, 90%<br>partial alignment | chromosome                         |

|                                        |       |       |                                      |                                                                                               |            |
|----------------------------------------|-------|-------|--------------------------------------|-----------------------------------------------------------------------------------------------|------------|
| KX02_1833                              | 579   | 192   | XRE family transcriptional regulator | <i>Piscirickettsia salmonis</i> , KW89_3p87, 30%                                              | pPSA1-3    |
| KX02_1840                              | 1,140 | 379   | restriction-modification methylase   | TX07-6608, KX00_2252, 97%                                                                     | plasmid 4  |
| KX02_1841                              | 387   | 128   | transposase                          | <i>Rickettsia</i> endosymbiont of <i>Ixodes pacificus</i> , REIP_0821, 56%                    | ND         |
| KX02_1842                              | 285   | 94    | integrase                            | <i>Candidatus Caedibacter acanthamoebae</i> , M40_09375, 72%                                  | plasmid    |
| KX02_1843                              | 288   | 95    | integrase                            | <i>Rickettsia</i> endosymbiont of <i>Ixodes pacificus</i> , REIP_1487, 84%                    | ND         |
| KX02_1846                              | 225   | 74    | transposase                          | <i>F. tularensis</i> , <i>F. opportunistica</i> MA06-7296, BBG19_0173, 100% partial alignment | chromosome |
| KX02_1848                              | 3,024 | 1,007 | transposase                          | TX07-6608, KX00_2256, 97% partial alignment                                                   | plasmid 4  |
| KX02_1849                              | 576   | 191   | resolvase                            | Tx07-6608, KX00_2126, 93%                                                                     | plasmid 3  |
| KX02_1850                              | 948   | 315   | merR regulatory family protein       | <i>Fangia hongkongensis</i> , WP_018298709.1, 54%                                             | ND         |
| KX02_1852                              | 141   | 46    | putative transposase                 | <i>Francisella</i> sp. W12-1067, FRA_44c12930, 91%                                            | ND         |
| KX02_1853                              | 564   | 187   | transposase                          | TX07-6608, KX00_2159, 88% + other copies                                                      | plasmid 3  |
| KX02_1854                              | 2,634 | 877   | transposase                          | <i>F. novicida</i> DPG_3A-IS, CH70_1118 91%                                                   | chromosome |
| KX02_1857                              | 123   | 40    | transposase                          | TX07-6608, KX00_2171, 90%                                                                     | plasmid 3  |
| KX02_1858                              | 315   | 104   | transposase                          | <i>Alteromonas lipolytica</i> , BFC17_07755, 70%                                              | ND         |
| KX02_1859                              | 135   | 44    | transposase                          | <i>Piscirickettsia salmonis</i> , AVI48_08835, 62%                                            | chromosome |
| KX02_1862                              | 480   | 159   | integrase                            | <i>Legionella spiritensis</i> , Lspi_2204, 76%                                                | ND         |
| KX02_1868                              | 195   | 64    | transposase                          | <i>F. tularensis</i> , multiple genomes, 88%                                                  | chromosome |
| KX02_1872                              | 114   | 37    | integrase                            | <i>Paenibacillus terrae</i> HPL-003, HPL003_22625, 73%                                        | chromosome |
| KX02_1876                              | 660   | 219   | chromosome partitioning protein ParA | <i>Nitrosomonas ureae</i> , SAMN05216406_13719, 46%                                           | ND         |
| KX02_1880                              | 573   | 190   | integrase                            | TX07-6608, KX00_2267, 96%                                                                     | plasmid 4  |
| ORF not called coordinates 33574-34470 | 1,071 | 356   | Rep                                  | TX07-6608, KX00_2266, 70%                                                                     | plasmid 4  |



***F. frigiditurris***  
**CA97-1460**

| <b>pFCD_1</b> | <b>6,176 bp</b> | <b>7 ORFs</b>     |                    |                                                                                        |                                    |
|---------------|-----------------|-------------------|--------------------|----------------------------------------------------------------------------------------|------------------------------------|
| Locus_tag     | ORF size (bp)   | protein size (aa) | annotated function | closest database hit species, identifier, %identity                                    | hit location (chromosome, plasmid) |
| KX01_RS09210  | 291             | 96                | hypothetical       | <i>Shingobium</i> sp. CCH11-B1, WP_066769463, 37%                                      | ND                                 |
| KX01_RS09215  | 276             | 91                | hypothetical       | <i>Alphaproteobacteria</i> bacterium 41-28, BGO67_01715, 49%                           | ND                                 |
| KX01_RS09220  | 681             | 226               | hypothetical       | <i>Francisella</i> cf. <i>tularensis</i> subsp. 3523, FN3523_0715, 61%                 | chromosome                         |
| KX01_RS09225  | 1,857           | 618               | MobB               | <i>Francisella</i> cf. <i>tularensis</i> subsp. <i>novicida</i> 3523, FN3523_0716, 60% | chromosome                         |
| KX01_RS09230  | 552             | 183               | hypothetical       | no hits                                                                                | NA                                 |
| KX01_RS09235  | 276             | 91                | hypothetical       | no hits                                                                                | NA                                 |
| KX01_RS09240  | 828             | 275               | RepB               | TX07-6608, KX00_2266, 43%                                                              | plasmid 4                          |

***F. novicida***  
**DPG\_3A-IS**

| <b>Plasmid 1*</b> | <b>41,959 bp</b> | <b>42 ORFs</b>    |                               |                                                                       |                                    |
|-------------------|------------------|-------------------|-------------------------------|-----------------------------------------------------------------------|------------------------------------|
| Locus_tag         | ORF size (bp)    | protein size (aa) | annotated function            | closest database hit species, identifier, %identity                   | hit location (chromosome, plasmid) |
| CH70_RS09710      | 561              | 186               | resolvase                     | <i>F. novicida</i> PA10-7858, N894_0050, 99%                          | pFNPA10                            |
| CH70_RS09715      | 360              | 119               | transcriptional regulator     | <i>F. novicida</i> PA10-7858, N894_0049, 85%                          | pFNPA10                            |
| CH70_RS09720      | 678              | 225               | Fic protein family            | <i>Fangia hongkongensis</i> , WP_018299747, 82%                       | ND                                 |
| CH70_RS09725      | 393              | pseudo            | DDE transposase               | NA                                                                    | NA                                 |
| CH70_RS09740      | 360              | 119               | hypothetical protein          | <i>Francisella</i> cf. <i>novicida</i> Fx1, FNFX1_0922, 89%           | chromosome                         |
| CH70_RS09745      | 599+             | pseudo            | transposase                   | NA                                                                    | NA                                 |
| CH70_RS09750      | 993              | 330               | IS5/IS1182 family transposase | <i>F. tularensis</i> subsp. <i>novicida</i> PA10-7858, N894_0399, 99% | chromosome                         |
| CH70_RS09760      | 885              | 294               | response regulator            | <i>F. tularensis</i> , multiple genomes, WP_032730214, 100%           | chromosome                         |
| CH70_RS09765      | 873              | 290               | transposase                   | TX07-6608, multiple copies, 75%                                       | chromosome                         |

|              |      |        |                                       |                                                                          |            |
|--------------|------|--------|---------------------------------------|--------------------------------------------------------------------------|------------|
| CH70_RS09780 | 744  | 247    | DDE transposase                       | <i>F. tularensis</i> subsp. novicida GA99-3548, FTDG_01089, 99% + others | chromosome |
| CH70_RS10200 | 128+ | pseudo | transposase                           | NA                                                                       | NA         |
| CH70_RS09785 | 774  | 247    | DDE transposase                       | <i>F. tularensis</i> subsp. novicida GA99-3548, FTG_01150, 99% + others  | chromosome |
| CH70_RS09790 | 2877 | 958    | DDE transposase                       | multiple <i>Francisella</i> genomes, 97%+                                | various    |
| CH70_RS09795 | 555  | 184    | transposase                           | <i>F. frigiditurris</i> CA97-1460, KX01_1492, 98%                        | chromosome |
| CH70_RS09805 | 978  | 325    | cell division protein Fic             | <i>F. frigiditurris</i> CA97-1460, KX01_1490, 100%                       | chromosome |
| CH70_RS09815 | 642  | 213    | plasmid partitioning APTase ParM      | <i>F. hispaniensis</i> FSC454, AUF42_00010, 97%                          | ND         |
| CH70_RS09825 | 867  | 288    | transposase                           | <i>F. uliginis</i> TX077310, F7310_07010, 93%                            | chromosome |
| CH70_RS09830 | 216  | 71     | transposase                           | multiple <i>Francisella</i> genomes, 100%                                | various    |
| CH70_RS09835 | 1161 | 386    | two-component sensor histidine kinase | <i>F. uliginis</i> TX077310, F7310_05465, 52%                            | chromosome |
| CH70_RS09840 | 5814 | 1937   | non-ribosomal peptide synthetase      | TX07-6608, KX00_2182, 79%                                                | plasmid 3  |
| CH70_RS09845 | 873  | 290    | transposase                           | TX07-6608, multiple hits, 75%                                            | chromosome |
| CH70_RS09855 | 557+ | pseudo | transposase                           | NA                                                                       | NA         |
| CH70_RS09865 | 744  | 247    | DDE transposase                       | multiple <i>Francisella</i> genomes, 100%                                | various    |
| CH70_RS09870 | 993  | 330    | IS5/IS1182 family transposase         | multiple <i>Francisella</i> genomes, 100%                                | various    |
| CH70_RS09875 | 297  | 98     | transposase                           | TX07-6608, KX00_2166, 88%                                                | plasmid 3  |
| CH70_RS09880 | 873  | 290    | transposase                           | TX07-6608, multiple hits, 75%                                            | various    |
| CH70_RS09885 | 284+ | pseudo | invertase                             | NA                                                                       | NA         |
| CH70_RS09890 | 1539 | 512    | replication initiation protein        | <i>F. tularensis</i> subsp. novicida FAI, DR83_1899, 98%                 | ND         |
| CH70_RS09900 | 873  | 290    | transposase                           | TX07-6608, multiple hits, 75%                                            | various    |
| CH70_RS09905 | 297  | 98     | transposase                           | TX07-6608, KX00_2166, 88%                                                | plasmid 3  |
| CH70_RS09910 | 255  | 84     | transcriptional regulator             | <i>F. tularensis</i> subsp. novicida GA99-3548, FTDG_00231, 61%          | ND         |
| CH70_RS09915 | 333  | 110    | mRNA interferase PemK                 | <i>Francisella</i> cf. novicida Fx1, FNFX1_0647, 64%                     | chromosome |
| CH70_RS09920 | 744  | 247    | DDE transposase                       | multiple <i>Francisella</i> genomes, 100%                                | ND         |

|              |     |     |             |                                                                       |
|--------------|-----|-----|-------------|-----------------------------------------------------------------------|
| CH70_RS09930 | 867 | 288 | transposase | <i>F. tularensis</i> subsp. <i>novicida</i> FAI, multiple copies, 99% |
|--------------|-----|-----|-------------|-----------------------------------------------------------------------|

---

***F. hispaniensis***

**FSC454**

| <b>pFSC454*</b> | <b>16,037 bp</b> | <b>13 ORFs</b>    |                                           |                                                     |                                    |
|-----------------|------------------|-------------------|-------------------------------------------|-----------------------------------------------------|------------------------------------|
| Locus_tag       | ORF size (bp)    | protein size (aa) | annotated function                        | closest database hit species, identifier, %identity | hit location (chromosome, plasmid) |
| FSC454_RS09425  | 729              | 242               | hypothetical protein [response regulator] | <i>F. philomiragia</i> GA01-2801, LA02_1244, 39%    | chromosome                         |
| FSC454_RS09435  | 1413             | 470               | Rep                                       | <i>F. novicida</i> PA10-7858, N894_0057, 43%        | pFNPA10                            |
| FSC454_RS09440  | 294              | 97                | transcriptional regulator                 | TX07-6608, KX00_2132, 97%                           | plasmid 3                          |
| FSC454_RS09445  | 330              | 109               | addiction module toxin RelE               | TX07-6608, KX00_2131, 96%                           | plasmid 3                          |
| FSC454_RS09455  | 666              | 221               | IS5/IS1182 family transposase             | <i>F. uliginis</i> TX077310, F7310_00920, 88%       | chromosome                         |
| FSC454_RS09495  | 696              | 231               | hypothetical protein [response regulator] | <i>F. philomiragia</i> GA01-2801, LA02_1244, 39%    | chromosome                         |
| FSC454_RS09505  | 149+             | pseudo            | IS5 family transposase                    | NA                                                  | NA                                 |

\*hypothetical not included

+pseudo genes with no stop or no start, ORF could not be determined

ND: replicons were not determined in genome sequence
