# Supplementary material for: Shared features of cryptic plasmids from environmental and pathogenic Francisella species
Source: PubMed Central journal article supplement (PMC5570271; doi:10.1371/journal.pone.0183554), 2017-08-24
Supplement: pone.0183554.s007.pdf [file pone.0183554.s007.pdf]

Table S2. Tandem Repeats Finder output

|                   | Indices      | Period Size | Copy Number | Consensus Size | Percent Matches | Percent Indels | Score | A  | C  | G  | T  | Entropy (0-2) |
|-------------------|--------------|-------------|-------------|----------------|-----------------|----------------|-------|----|----|----|----|---------------|
| 6608 plasmid2     | 1630--1700   | 12          | 5.4         | 12             | 69              | 18             | 52    | 16 | 15 | 11 | 56 | 1.67          |
| 6608 plasmid3     | 11201--11262 | 12          | 5.2         | 12             | 100             | 0              | 124   | 24 | 24 | 0  | 51 | 1.48          |
|                   | 35292--35353 | 12          | 5.2         | 12             | 100             | 0              | 124   | 51 | 0  | 24 | 24 | 1.48          |
| 6608 plasmid4     | 11473--11512 | 13          | 3.0         | 14             | 75              | 24             | 50    | 35 | 0  | 7  | 57 | 1.27          |
|                   | 46997--47037 | 20          | 2.0         | 21             | 90              | 4              | 66    | 24 | 0  | 7  | 68 | 1.15          |
| AZ06-7470 plasmid | 29975--30023 | 8           | 6.1         | 8              | 100             | 0              | 98    | 24 | 24 | 12 | 38 | 1.90          |
|                   | 31065--31185 | 8           | 15.1        | 8              | 100             | 0              | 242   | 24 | 24 | 13 | 37 | 1.91          |
| DPG_3A-IS plasmid | 18311--18349 | 18          | 2.2         | 18             | 90              | 9              | 62    | 33 | 7  | 10 | 48 | 1.66          |
|                   | 20916--20946 | 9           | 3.4         | 9              | 100             | 0              | 62    | 22 | 0  | 9  | 67 | 1.19          |
| pFSC454           | 2689--2726   | 18          | 2.1         | 19             | 85              | 5              | 51    | 36 | 5  | 7  | 50 | 1.54          |

Columns are:

Indices of the repeat relative to the start of the sequence.

Period size of the repeat.

Number of copies aligned with the consensus pattern.

Size of consensus pattern (may differ slightly from the period size).

Percent of matches between adjacent copies overall.

Percent of indels between adjacent copies overall.

Alignment score

Percent composition for each of the four nucleotides.

Entropy measure based on percent composition.
